# Supplementary material for: Using the theory of planned behavior to predict factors influencing fast-food consumption among college students
Source: Springer Nature journal article supplement (doi:10.1186/s12889-023-15923-1), 2023-05-27
Supplement: MOESM1 [file 12889_2023_15923_MOESM1_ESM.pdf]

## QUESTIONNAIRE

Name: \_\_\_\_\_

Gender: \_\_\_\_\_

Age: \_\_\_\_\_

Weight: \_\_\_\_\_

Height: \_\_\_\_\_

BMI: \_\_\_\_\_

### QUESTION NO 1

#### DEMOGRAPHIC CHARACTERISTICS OF COLLEGE STUDENTS

|     |                                            |                                                                                             |
|-----|--------------------------------------------|---------------------------------------------------------------------------------------------|
| Q#1 | Mothers education                          | 1. Primary School<br>2. Secondary school<br>3. High School<br>4. Academic Degree<br>5. None |
| Q#2 | Fathers education                          | 1. Primary School<br>2. Secondary school<br>3. High School<br>4. Academic Degree<br>5. None |
| Q#3 | Do you have an interest in health?         | 1. Very much<br>2. Much<br>3. Average<br>4. Little<br>5. Very Little                        |
| Q#4 | Do you have an interest in weight control? | 1. Very much<br>2. Much<br>3. Average<br>4. Little<br>5. Very Little                        |
| Q#5 | Who do you usually eat with?               | 1. Whole family                                                                             |

|  |  |                                                                                                                                             |
|--|--|---------------------------------------------------------------------------------------------------------------------------------------------|
|  |  | <ol style="list-style-type: none"> <li>2. Some members of the family</li> <li>3. Alone</li> <li>4. Friends</li> <li>5. Relatives</li> </ol> |
|--|--|---------------------------------------------------------------------------------------------------------------------------------------------|

## QUESTION NO 2

### PATTERNS OF FAST FOOD CONSUMPTION

|      |                                                                |                                                                                                                                                                                         |
|------|----------------------------------------------------------------|-----------------------------------------------------------------------------------------------------------------------------------------------------------------------------------------|
| Q#6  | Which of the following food do you consume the most in a week? | <ol style="list-style-type: none"> <li>1. Hamburger</li> <li>2. French Fries</li> <li>3. Pizza</li> <li>4. Fried Chicken</li> <li>5. Doughnuts</li> </ol>                               |
| Q#7  | Reasons for consuming fast food                                | <ol style="list-style-type: none"> <li>1. When parents are not at home</li> <li>2. Special days</li> <li>3. Meeting Friends</li> <li>4. When Hungry</li> <li>5. Out of Habit</li> </ol> |
| Q#8  | To whom do you enjoy eating fast food?                         | <ol style="list-style-type: none"> <li>1. Parents</li> <li>2. Brothers/Sisters</li> <li>3. Friends</li> <li>4. Alone</li> <li>5. Relatives</li> </ol>                                   |
| Q#9  | What do you consume fast food as?                              | <ol style="list-style-type: none"> <li>1. A meal</li> <li>2. Snack</li> </ol>                                                                                                           |
| Q#10 | Place where you eat fast food                                  | <ol style="list-style-type: none"> <li>1. Near Home</li> <li>2. Near School</li> <li>3. Downtown</li> </ol>                                                                             |

|  |  |           |
|--|--|-----------|
|  |  | 4. Others |
|--|--|-----------|

### QUESTION NO 3

#### INTENTION FOR CONSUMING FAST FOOD

|      |                                               |                                                             |
|------|-----------------------------------------------|-------------------------------------------------------------|
| Q#11 | I am inclined to use hamburgers in a month    | 1. Not at all<br>2. A little<br>3. Somewhat<br>4. Very Much |
| Q#12 | I am inclined to use French fries for a month | 1. Not at all<br>2. A little<br>3. Somewhat<br>4. Very Much |
| Q#13 | I am inclined to use a pizza in a month       | 1. Not at all<br>2. A little<br>3. Somewhat<br>4. Very Much |
| Q#14 | I am inclined to use fried chicken in a month | 1. Not at all<br>2. A little<br>3. Somewhat<br>4. Very Much |
| Q#15 | I am inclined to use doughnuts in a month     | 1. Not at all<br>2. A little<br>3. Somewhat<br>4. Very Much |

### QUESTION NO 4

#### ATTITUDE TOWARD FAST FOOD CONSUMPTION

|      |                                                   |                                                             |
|------|---------------------------------------------------|-------------------------------------------------------------|
| Q#16 | Fast food is familiar to me                       | 1. Not at all<br>2. A little<br>3. Somewhat<br>4. Very Much |
| Q#17 | I think that fast food is not good for the health | 1. Not at all                                               |

|      |                                                                  |                                                             |
|------|------------------------------------------------------------------|-------------------------------------------------------------|
|      |                                                                  | 2. A little<br>3. Somewhat<br>4. Very Much                  |
| Q#18 | I think that fast food can provide all vital nutrients for us    | 1. Not at all<br>2. A little<br>3. Somewhat<br>4. Very Much |
| Q#19 | I think that fast food is delicious                              | 1. Not at all<br>2. A little<br>3. Somewhat<br>4. Very Much |
| Q#20 | I think that fast food stores provide an attractive environments | 1. Not at all<br>2. A little<br>3. Somewhat<br>4. Very Much |
| Q#21 | I think that fast food stores are clean                          | 1. Not at all<br>2. A little<br>3. Somewhat<br>4. Very Much |
| Q#22 | I think that fast food is clean and safe                         | 1. Not at all<br>2. A little<br>3. Somewhat<br>4. Very Much |
| Q#23 | I think that fast food portions are large enough to feel full    | 1. Not at all<br>2. A little<br>3. Somewhat<br>4. Very Much |
| Q#24 | I think that fast food has a lot of salt                         | 1. Not at all<br>2. A little<br>3. Somewhat<br>4. Very Much |

|      |                                                   |                                                             |
|------|---------------------------------------------------|-------------------------------------------------------------|
| Q#25 | I think that fast food has a lot of fat           | 1. Not at all<br>2. A little<br>3. Somewhat<br>4. Very Much |
| Q#26 | I think that consuming fast food will make me fat | 1. Not at all<br>2. A little<br>3. Somewhat<br>4. Very Much |
| Q#27 | I think that fast food has a lot of calories      | 1. Not at all<br>2. A little<br>3. Somewhat<br>4. Very Much |

## QUESTION NO 5

### SUBJECTIVE NORM FOR FAST FOOD CONSUMPTION

|      |                      |                                                                                                                                                                                                    |                                                             |
|------|----------------------|----------------------------------------------------------------------------------------------------------------------------------------------------------------------------------------------------|-------------------------------------------------------------|
| Q#28 | Motivation to comply | 1. I follow my family's beliefs<br>2. I follow the beliefs of teachers<br>3. I follow the beliefs of my friend                                                                                     | 1. Not at all<br>2. A little<br>3. Somewhat<br>4. Very Much |
| Q#29 | Normative Belief     | 1. I think that my family would like my fast food consumption<br>2. I think that my teachers would like my fast food consumption<br>3. I think that my friends would like my fast food consumption | 1. Not at all<br>2. A little<br>3. Somewhat<br>4. Very Much |

|      |                                         |                                        |                                                             |
|------|-----------------------------------------|----------------------------------------|-------------------------------------------------------------|
| Q#30 | Motivation to comply × Normative belief | 1. Family<br>2. Teachers<br>3. Friends | 1. Not at all<br>2. A little<br>3. Somewhat<br>4. Very Much |
|------|-----------------------------------------|----------------------------------------|-------------------------------------------------------------|

## QUESTION NO 6

### PERCEIVED BEHAVIORAL CONTROL TOWARD FAST FOOD CONSUMPTION

|      |                                                                                                   |                                                             |
|------|---------------------------------------------------------------------------------------------------|-------------------------------------------------------------|
| Q#31 | I can eat fast food even if fewer fast-food stores are near                                       | 1. Not at all<br>2. A little<br>3. Somewhat<br>4. Very Much |
| Q#32 | I think that meeting friends at places other than fast food stores would be difficult             | 1. Not at all<br>2. A little<br>3. Somewhat<br>4. Very Much |
| Q#33 | I can eat fast food even while I am on diet.                                                      | 1. Not at all<br>2. A little<br>3. Somewhat<br>4. Very Much |
| Q#34 | I can eat fast food even if I have to wait for a long time                                        | 1. Not at all<br>2. A little<br>3. Somewhat<br>4. Very Much |
| Q#35 | I can eat fast food even if the fewer advertisement for fast food is on TV, on the internet, etc. | 1. Not at all<br>2. A little                                |

|      |                                                                                                                                        |                                                             |
|------|----------------------------------------------------------------------------------------------------------------------------------------|-------------------------------------------------------------|
|      |                                                                                                                                        | 3. Somewhat<br>4. Very Much                                 |
| Q#36 | I can eat fast food even if they offer a few sale promotions                                                                           | 1. Not at all<br>2. A little<br>3. Somewhat<br>4. Very Much |
| Q#37 | I think that changing my fast food consumption behaviors for health would be difficult                                                 | 1. Not at all<br>2. A little<br>3. Somewhat<br>4. Very Much |
| Q#38 | I think that using places other than fast food stores for special occasions such as birthdays would be difficult.                      | 1. Not at all<br>2. A little<br>3. Somewhat<br>4. Very Much |
| Q#39 | I think that changing my fast food consumption behavior is difficult because I have eaten them from a very young age                   | 1. Not at all<br>2. A little<br>3. Somewhat<br>4. Very Much |
| Q#40 | I can eat fast food even if I get nutrition education using multimedia (e.g website, video clip) rather than basic lecture or brochure | 1. Not at all<br>2. A little<br>3. Somewhat<br>4. Very Much |
| Q#41 | I can eat fast food even if I get continued nutrition education                                                                        | 1. Not at all<br>2. A little<br>3. Somewhat<br>4. Very Much |
| Q#42 | I can eat fast food even if I learn how to quickly prepare a simple meal                                                               | 1. Not at all<br>2. A little<br>3. Somewhat<br>4. Very Much |

|      |                                                                                                                                  |                                                             |
|------|----------------------------------------------------------------------------------------------------------------------------------|-------------------------------------------------------------|
| Q#43 | I can eat fast food even if I get nutrition education about the impact of fast food on health (e.g. calories, nutrient content). | 1. Not at all<br>2. A little<br>3. Somewhat<br>4. Very Much |
|------|----------------------------------------------------------------------------------------------------------------------------------|-------------------------------------------------------------|
